# Updated efficacy and safety of CDK4/6 inhibitors plus endocrine therapy in elderly women with HR+/HER-2 metastatic or advanced breast cancer: patient-level network meta-analysis

Henry WC Leung<sup>1</sup>, Mei-Ching Tsai<sup>2</sup>, Shin-Hang Leung<sup>3</sup>, Shyh-Yau Wang<sup>3</sup>, Agnes LF Chan<sup>4</sup>

<sup>1</sup>Department of Radiation Oncology, An-Nan Hospital, China Medical University, Tainan, Taiwan

<sup>2</sup>Department of Medical Materials Supply, Tainan Municipal Hospital (Managed by Show Chwan Medical Care Corporation), Tainan, Taiwan

<sup>3</sup>Department of Radiology, An-Nan Hospital, China Medical University, Tainan, Taiwan

<sup>4</sup>Department of Pharmacy, Kaohsiung Show Chwan Memorial Hospital, Kaohsiung, Taiwan

**Correspondence to:** Agnes LF Chan; **email:** [bigevefong@gmail.com](mailto:bigevefong@gmail.com), <https://orcid.org/0000-0003-4071-8132>

**Keywords:** breast cancer, elderly patients, abemaciclib, ribociclib, palbociclib, network meta-analysis

**Received:** February 7, 2025

**Accepted:** April 24, 2025

**Published:** May 25, 2025

**Copyright:** © 2025 Leung et al. This is an open access article distributed under the terms of the [Creative Commons Attribution License](https://creativecommons.org/licenses/by/4.0/) (CC BY 4.0), which permits unrestricted use, distribution, and reproduction in any medium, provided the original author and source are credited.

## ABSTRACT

**Background:** Breast cancer (BC) is the most common cancer in women worldwide. More than 80% of new cases of invasive BC are diagnosed among women aged 50 years or older, and they mainly comprise estrogen receptor (ER)-positive and HER2-negative subtypes of the disease. About 91% of deaths occur in this age demographic. Treatment with cyclin-dependent kinase 4/6 inhibitors has resulted in significantly increased survival benefits in terms of progression-free survival and overall survival (OS), but evidence for their use in treating older women with metastatic BC is limited. Therefore, we evaluated the efficacy and safety of cyclin-dependent kinase 4/6 (CDK4/6) inhibitors combined with endocrine therapy in older women with HR+/HER-2 metastatic or advanced BC.

**Methods:** We conducted a comprehensive search of the PubMed and EMBASE databases between January 2018 and December 2024 for phase II or III randomized controlled trials (RCTs) investigating treatment modalities in HR+/HER-2 metastatic or advanced BC. Kaplan–Meier curves for progression-free survival (PFS) and overall survival (OS) were reconstructed to retrieve individual patient-level data to strengthen the comparison of the benefits of all treatment modalities of interest. In this network meta-analysis (NMA), each study was pooled in a fixed-effects or randomized-effects model based on the individual study quality. We also performed a subgroup analysis and reported the incidence of  $\geq$ grade 3 adverse events in elderly patients ( $\geq 65$  years). The primary endpoints were the pooled PFS, OS, and comparable safety rankings. The treatment modalities were ranked using SUCRA scores.

**Results:** We identified 15 phase II and III randomized controlled trials with seven treatment modalities that met the inclusion criteria. From these trials, rates of PFS and OS for 1799 and 1568 patients, respectively, were included in the analysis. In terms of PFS, Palbociclib + Letrozole (Let) ranked highest among all treatment modalities, followed by Ribociclib + Fulvestrant (Ful). Meanwhile, Palbociclib plus Ful showed superior OS ranking compared to other treatments in older women with mBC. Regarding safety, Palbociclib plus Endocrine (letrozole or fulvestrant) (79.3%), Ribociclib plus Let (87%), and Abemaciclib + ET (letrozole or anastrozole) were associated with a relatively high incidence of  $\geq$ grade 3 adverse events (AEs) compared to placebo plus endocrine therapy.

**Conclusions:** In this network meta-analysis, the combination of Palbociclib with Letrozole or Fulvestrant was found to have an effect on PFS and OS, and Ribociclib + Let was found to be a relatively safe treatment option for elderly women with HR+/HER2 metastatic or advanced BC. However, given the limited evidence in older populations, comprehensive, well-designed, large-scale randomized controlled trials are needed to address this issue.

## INTRODUCTION

The elderly population is increasing worldwide, and the proportion of Taiwanese women who are  $\geq 65$  years old is expected to increase from 14% in 2018 to 20% in 2025 [1]. By 2024, approximately 310,720 women in the United States will be diagnosed with invasive breast cancer, with approximately two-thirds of cases occurring in women 55 years or older [2]. As the population ages and cancer incidence increases with age, cancer among the U.S. population aged 65 years or older is expected to increase by 67% from 2010 to 2030 [3]. Despite comprising a large proportion of breast cancer patients, older patients have historically been underrepresented in clinical trials of new anticancer drugs [4]. Due to this difference, clinical guidelines for the treatment of breast cancer in older adults are mainly based on evidence from younger patients, who may have different disease characteristics and prognoses. In addition, the treatment of elderly breast cancer patients is challenging because comorbidities and frailty often occur in advanced age [5].

Hormone receptor-positive (HR+)/human epidermal growth factor receptor 2-negative (HER2-) breast cancer is the most common molecular subtype among older patients and those with advanced/metastatic breast cancer (a/mBC). About 91% of deaths occur in this age demographic. Aging is one of the biggest risk factors for breast cancer in women. About 85% of breast cancers occur in women who have no family history of the disease. These cancers develop due to gene mutations caused by the aging process and life processes rather than inherited mutations [6]. Cyclin-dependent kinase 4/6 (CDK4/6) inhibitors have been shown to significantly increase survival benefits in terms of progression-free survival and overall survival (OS), but the evidence on treating older women with metastatic BC is limited. Therefore, we comprehensively evaluated the efficacy and safety of cyclin-dependent kinase 4/6 (CDK4/6) inhibitors combined with endocrine therapy (ET) in older women with HR+/HER-2 metastatic or advanced BC.

## MATERIALS AND METHODS

### Search strategy and selection criteria

We conducted a comprehensive search of the literature for phase II or phase III randomized controlled trials

(RCTs) investigating the outcomes of anti-CDK4/6 inhibitors (CDK4/6i) combined with ET (Letrozole or Fulvestrant) versus ET alone in the treatment of elderly patients (65 years and older) with HR+/HER2- metastatic or advanced BC. The search for eligible randomized controlled trials (RCTs) was limited to studies published in English and available via the PubMed, Embase, Cochrane Library, and Web of Science databases, in accordance with the Preferred Reporting Items for Systematic Reviews and Meta-Analyses (PRISMA) guidelines [7]. The search included updated randomized controlled trials published between January 2018 and December 2023. The detailed search strategies are described in the Supplementary Table 1 (online only). From the selected articles, we manually searched for additional references to identify potentially overlooked studies.

All trials included met the following inclusion criteria: (1) they were randomized phase II or III clinical trials comparing anti-CDK4/6 inhibitors (Palbociclib, Ribociclib, or Abemaciclib) combined with ET (Letrozole or Fulvestrant) versus ET alone in the treatment of elderly patients (65 years and older); (2) they included patients with proven HR+/HER2- metastatic breast cancer or advanced BC; (3) they provided detailed data on their methods, the characteristics of the elderly patient population, overall survival, progression-free survival, and adverse events; and (4) they compared at least two groups containing the item of interest listed. Studies, case reports, case series, and reviews that did not meet the above inclusion criteria were excluded.

### Data extraction

Two reviewers independently reviewed and screened all eligible studies based on the above screening criteria. Any differences in opinion were evaluated by a third reviewer to achieve a consistent consensus. We extracted and summarized the characteristics of the population data from all eligible studies, including the name of each study's first author, the intervention, and the outcome in terms of PFS, overall survival (OS), and SAEs (defined as  $\geq$  grade 3 AEs), in a standardized table. We also analyzed hematological and non-hematological subgroups in the SAEs.

We used individual patient data (IPD) analysis to produce more precise, reliable, and accurate results to

compare the efficacy of the treatment modalities of interest based on patient characteristics. The advantage of utilizing IPD analysis is that it can enhance the clinical relevance of study results, resulting in more clinically meaningful analysis and interpretation. Therefore, we graphically reconstructed PFS and OS data from IPD in each trial arm, using WebPlotDigitizer to digitize the Kaplan–Meier (KM) curves based on the reconstructive algorithm outlined by Guyot et al. [8, 9]. Using visual comparison, log-rank p-values, and hazard ratios (HRs), we compared the reconstructed IPD PFS Kaplan–Meier plots and data with the values reported in the original studies. We did not reconstruct the OS KM curve because raw OS KM curve data were not available for older patients in every study included.

### Study quality assessment

Two independent investigators used the GRADE approach of the Cochrane Collaboration risk of bias (RoB) 2 assessment tool was used to assess the quality of each included study. There are five bias domains in the revised RoB tool [10], including (1) bias due to the randomization process, (2) deviation from intended intervention, (3) missing outcome data, (4) measurement of outcomes, and (5) selection of the reported result, as well as an “overall risk of bias” judgment. Each domain was explicitly evaluated as having a low risk of bias, a high risk of bias, or some concerns [11].

### Statistical analysis

Pairwise meta-analyses were performed using Review Manager Version 5.4, using the hazard ratio (HR) to estimate the pooled effect size [12]. Heterogeneity was assessed using the  $I^2$  test, with  $I^2$  values  $>50\%$  indicating heterogeneity. If significant heterogeneity was observed, a random-effects model was selected; otherwise, a fixed-effects model was used. The results were reported as ORs with corresponding 95% confidence intervals (CIs). Statistical significance was defined as  $P < 0.05$ .

Bayesian network meta-analysis was performed using WinBUGS 1.4.3 (MRC Biostatistics Unit, Cambridge, and Imperial College School of Medicine, London, UK) and NetMetaXL (version 1.6.1) to compare the efficacy and safety of applying 6 CDK4/6 inhibitors plus endocrine therapy in elderly patients with HR+/HER-2 metastatic or advanced breast cancer [13]. In our network, a fixed-effects model and a random-effects model were determined based on the deviance information criteria (DIC). Model convergence was used to compare within- and between-chain variances to

calculate the potential scale-reduction factor (PSRF). Convergence is good when the PSRF value approaches to 1.0 and the variations stabilize as the number of simulations increases [14]. Inconsistencies between direct and indirect evidence were assessed by plotting the posterior mean deviation for individual data points in the inconsistency model against the posterior mean deviation in the consistent model to identify potential inconsistencies within the network.

Cumulative ranking curves (SUCRAs) were used to rank treatments by summarizing and reporting the surface under the cumulative ranking curve, which is a summary of the rank distribution and can be interpreted as the estimated probability of the most effective treatment.

Sensitivity analysis was performed using fixed- and random-effects models to test the robustness of network comparisons by repeating the main calculations.

### Data availability statement

Data are provided within the manuscript or Supplementary Materials.

## RESULTS

### Characteristics of studies and patients included

By searching the PubMed, EMBASE, Cochrane Library, and Web of Science electronic databases, 15 randomized controlled trials involving seven treatment options were identified, with a total of 1799 and 1568 patients with PFS and OS results, respectively (Supplementary Figure 1). Among the studies, twelve were phase III randomized clinical trials [15–25], and three were phase II RCTs [26–28]. The publication years of the studies ranged from 2018 to 2024, with updated outcome data. Nine studies provided data on the HR for PFS and OS. However, data on the incidence of serious AEs are lacking, with only three studies reporting the percentage of AEs [1, 15, 25].

Most of the studies included patients aged 65 years and above, accounting for 42% to 70.3%. The majority of patients enrolled in the studies were postmenopausal women with HR-positive and HER2-negative recurrent or metastatic breast cancer who had not received prior systemic therapy for advanced disease. Viscera and bone were the most common sites of metastasis, ranging from 48.7% to 60% and 13.8% to 75.6%, respectively. In most studies, patients aged  $>65$  years had an ECOG performance status of 0 or 1. The study and patient characteristics are presented in Table 1.

**Table 1. Characteristics of studies included >65 yrs patients in the analysis.**

| Author/year                                                    | Study type            | ≥65 yrs ages, Events, n/N, %                                    | Intervention Group (A)                                      | Comparator Group (B)            | ≥Gr 3 neutropenia (%) A vs. B  | Any Grade AE A vs. B (%) | HR PFS (95%CI)                             | HR OS (95%CI)             | Site of metastases, n%   |                         |              |
|----------------------------------------------------------------|-----------------------|-----------------------------------------------------------------|-------------------------------------------------------------|---------------------------------|--------------------------------|--------------------------|--------------------------------------------|---------------------------|--------------------------|-------------------------|--------------|
|                                                                |                       |                                                                 |                                                             |                                 |                                |                          |                                            |                           | Visceral <sup>a</sup>    | Bone                    | LN           |
| 1. Sonke/2018 [14]<br>2. Hortobagyi/2022 [15]<br>(MONALEESA-2) | Phase 3               | 150/295 (51)<br>145/295 (49)                                    | Ribociclib +<br>Letrozole                                   | Letrozole +<br>placebo          | 78%<br>26%                     | 99%<br>94%               | 0.60<br>(0.39–0.92)                        | NA<br>0.87<br>(0.64–1.18) | 176 (59.7)<br>164 (55.7) | 216 (73.2)<br>65 (22.2) | NA           |
| 3. Slamon/2018 [16]<br>(MONALEESA-3)                           | Phase 3               | 95/226 (42.0)<br>70/113 (61.9)                                  | Ribociclib +<br>Fulvestrant                                 | Ful + placebo                   | NA                             | NA                       | 0.597<br>(0.436–0.818)                     | NA                        | 293 (60.5)               | 103 (75.6)              | NA           |
| 4. Slamon/2021 [17]<br>(MONALEESA-3)                           | Phase 3               | 106/226 (46.9)<br>67/113 (59.3)                                 | Ribociclib +<br>Fulvestrant                                 | Ful + placebo                   | –                              | –                        | –                                          | 0.72<br>(0.53–0.99)       | 170 (50)                 | 71 (21)                 | NA           |
| 5. Sledge/2020 [18]<br>(MONARCH-2)                             | Phase 3               | 52/92 (56.5)<br>86/155 (55.5)                                   | Abemaciclib +<br>Ful + placebo                              | Ful + placebo                   | NA                             | NA                       | 0.63<br>(0.45–0.87)                        | 0.898<br>(0.638–1.263)    | 137 (55.9)               | 66 (26.9)               | NA           |
| 6. Goetz/2021 [19]<br>(MONARCH-3)                              | Phase 3               | 52/90 (57.8)<br>86/155 (55.4)                                   | Abemaciclib +<br>Ful + placebo                              | Ful + placebo                   | 54% (163/302)<br>7.4% (12/162) | 65%<br>72%               | 0.60<br>(0.47–0.77)                        | NA                        | 119 (53.6)               | 58 (23.7)               | NA           |
| 7. Goetz/2024 [20]<br>(MONARCH-3)                              | Phase 3               | 49/74 (66.2)<br>93/140 (66.4)                                   | abemaciclib plus<br>NSAI                                    | NSAI + placebo                  |                                |                          | –                                          | 0.751<br>(0.539–1.049)    | 118 (53)                 | 49 (22.0)               | NA           |
| 8. Zhang/2020 [21]<br>(MONARCH PLUS)                           | Phase 3               | A:16/50 (32.0)<br>9/16 (56.3)<br>B: 12/26 (46.2)<br>6/14 (42.9) | A:Abemaciclib +<br>NSAI<br>B: Abemaciclib +<br>Ful+ placebo | NSAI + Placebo<br>Ful + placebo | NA                             | NA                       | 2.50<br>(0.56–11.1)<br>0.56<br>(0.24–1.26) | NA-                       | 24 (60)                  | NA                      | NA           |
| 9. Slamon/2024 [22]<br>(PALOMA-2)                              | Phase 3               | 111/181 (61.3)<br>50/81 (61.7)                                  | Palbociclib +<br>Letrozole                                  | Letrozole +<br>placebo          | NA                             | NA                       |                                            | 0.87<br>(0.62–1.22)       | 127 (48.5)               | NA                      | NA           |
| 10. Rugo/2018 [23]<br>(PALOMA 3)                               | Phase 3               | 39/86 (45.3)<br>22/43 (51.2)                                    | Palbociclib + Ful<br>+ placebo                              | Ful + placebo                   | NA                             | NA                       | 0.31<br>(0.19–0.50)                        | NA                        | 150 (49.3)               | 63 (20.7)               | NA           |
| 11. Xu/2022 [24]<br>(PALOMA-4)                                 | Phase 3               | 11/14 (78.6)<br>18/24 (75.0)                                    | Palbociclib +<br>Letrozole                                  | Letrozole +<br>placebo          | NA                             | NA                       | 1.247<br>(0.585–2.657)                     | NA-                       | 21 (55.3)                | NA                      | NA           |
| 12. Turner 2018 [25]<br>(PALOMA-3)                             | Phase 3               | 33/86 (38.4)<br>17/43 (39.5)                                    | Palbociclib + Ful<br>+ placebo                              | Placebo + Ful                   | NA                             | NA                       | NA                                         | 0.52<br>(0.33–0.82)       | 311-(59.7)               | NA                      | NA           |
| 13. Albanell/2021 [26]<br>(FLIPPER)                            | Phase 2<br>Random     | 20/47 (42.3)<br>27/45 (60.0)                                    | Palbociclib + Ful<br>+ placebo                              | Ful + placebo                   | NA-                            | NA-                      | 0.51<br>(0.34–0.75)                        | NA-                       | 55 (59.8)                | 62 (67.4)               | NA           |
| 14. Rugo/2018 [27]<br>15. Finn/2020 [28]<br>(PALOMA-1)         | Phase 2<br>open-label | 91/218 (41.7)<br>78/120 (65.0)<br>27/39 (69.2)<br>26/37 (70.3)  | Palbociclib +<br>Letrozole                                  | Letrozole +<br>placebo          | 79% vs. 24%                    | 99%<br>93%               | 0.55<br>(0.39–0.76)                        | 0.97<br>(0.57–1.65)       | 37 (48.7)                | 13 (18.6)               | 50<br>(54.3) |

<sup>a</sup>Includes liver, Lung. Abbreviations: HR: hazard; PFS: progression-free survival; OS: overall survival; NSAI: non-steroidal aromatase; Ful: Fulvestrant; LN: Lymph nodes.

## Network meta-analysis of treatment effects

### Pairwise analysis

In terms of PFS, the efficacy of CDK 4/6 inhibitors plus ET (Letrozole or Fulvestrant) presented as HR in pairwise analysis was 0.56 (95% CI: 0.50, 0.63) (Supplementary Figure 2).

### Kaplan-Meier survival curve in NMA

Palbociclib/Letrozole was found to be comparable to Ribociclib/Fulvestrant (OR =0.96, 95% CI=0.51 – 1.84) and significantly superior to Abemaciclib/Ful (OR= "0.46;95% CI=0.23 – 0.89), Ribociclib/ Let (OR = 0.35, 95% CI = 0.17–0.69) and placebo plus Let or Ful (OR=0.43, 95% CI=0.27 – 0.67). If compared with Abemaciclib+NSAI and Palbociclib +Ful, no significant difference was observed in terms of PFS.

In addition, no significant improvement in OS was found for all combinations of CDK4/6i with ET or NSAI (Table 2). A Kaplan–Meier pooled comparison plot of PFS for each regimen is shown in Figure 1.

### The SUCRA score plot ranking

The SUCRA score plot for PFS versus OS is shown in Figure 2. The probability rankings of the seven treatments show that Palbociclib+Let was associated with higher PFS but lower OS, while Ribociclib+ Fulvestrant was associated with higher PFS and OS. The PFS- and OS-improving effects of Ribociclib+ Fulvestrant ranked high. However, the probability ranking of Ribociclib plus Let was lower in PFS but higher in OS, while the results for the other regimens were comparable (Figure 2).

**Table 2. The league table for comparisons of progression survival (PFS) and overall survival (OS).**

|                        |                       |                         |                        |                        |                        |                       |
|------------------------|-----------------------|-------------------------|------------------------|------------------------|------------------------|-----------------------|
| <b>Palbociclib+Let</b> | 0.74<br>(0.40–1.37)   | 0.97<br>(0.45–2.07)     | 0.61<br>(0.29–1.32)    | 0.87<br>(0.42–1.79)    | 0.97<br>(0.61–1.56)    | 0.70<br>(0.36–1.34)   |
| 0.96<br>(0.51–1.84)    | <b>Ribociclib+Ful</b> | 0.76<br>(0.38–1.57)     | 0.83<br>(0.50–1.35)    | 0.65<br>(0.34–1.25)    | 0.76<br>(0.52–1.10)    | 0.94<br>(0.51–1.69)   |
| 0.67<br>(0.34–1.33)    | 0.70<br>(0.35–1.38)   | <b>Abemaciclib+NSAI</b> | 0.63<br>(0.27–1.47)    | 0.84<br>(0.37–1.89)    | 1.00<br>(0.54–1.81)    | 0.71<br>(0.34–1.54)   |
| 0.67<br>(0.33–1.37)    | 0.70<br>(0.34–1.45)   | 1.00<br>(0.48–2.13)     | <b>Palbociclib+Ful</b> | 0.54<br>(0.24–1.19)    | 0.63<br>(0.35–1.13)    | 0.88<br>(0.42–1.87)   |
| 0.46<br>(0.23–0.89)    | 0.47<br>(0.24–0.92)   | 0.68<br>(0.34–1.38)     | 0.68<br>(0.32–1.42)    | <b>Abemaciclib+Ful</b> | 0.85<br>(0.49–1.47)    | 0.61<br>(0.30–1.24)   |
| 0.43<br>(0.27–0.67)    | 0.44<br>(0.28–0.70)   | 0.64<br>(0.38–1.06)     | 0.64<br>(0.37–1.11)    | 0.94<br>(0.57–1.53)    | <b>Placebo+Let/Ful</b> | 0.72<br>(0.45–1.13)   |
| 0.35<br>(0.17–0.69)    | 0.36<br>(0.18–0.72)   | 0.52<br>(0.25–1.08)     | 0.52<br>(0.24–1.11)    | 0.77<br>(0.37–1.56)    | 0.82<br>(0.49–1.37)    | <b>Ribociclib+Let</b> |

Data are presented as odds ratio (OR) and 95% confidence intervals (CI). For PFS, OR < 1 favors the treatment on left column; For OS, OR < 1 favors the treatment on left row. Yellow color presented PFS and green color was OS.

### Network meta-analysis: treatment safety

Serious adverse events ( $\geq$  grade 3) are described in Table 3. In the fifteen studies included, there are only three reported adverse events in patients aged  $\geq 65$  years. The overall incidence of serious adverse events  $\geq$  grade 3 was 53.9% to 79.3%. Palbociclib+EN were associated with relatively higher all-grade AEs and grade  $\geq 3$  severe AEs compared with Ribociclib+Let or Abemaciclib+ET.

In the subgroup analysis of the incidence of hematological SAEs  $\geq$  grade 3 (including neutropenia, leukopenia, and anemia), the results for Pabociclib+EN (66.1%, 60.0%, and 24.8%, respectively) were higher than for Ribociclib+Let and Abemaciclib+ET. In terms of non-hematological aspects, the incidence of diarrhea was higher in the group treated with Abemaciclib+ET (28.8%) compared to the other two regimens. Furthermore, in the subgroup analysis, a higher rate of incidence of venous thrombosis events (VTEs) was

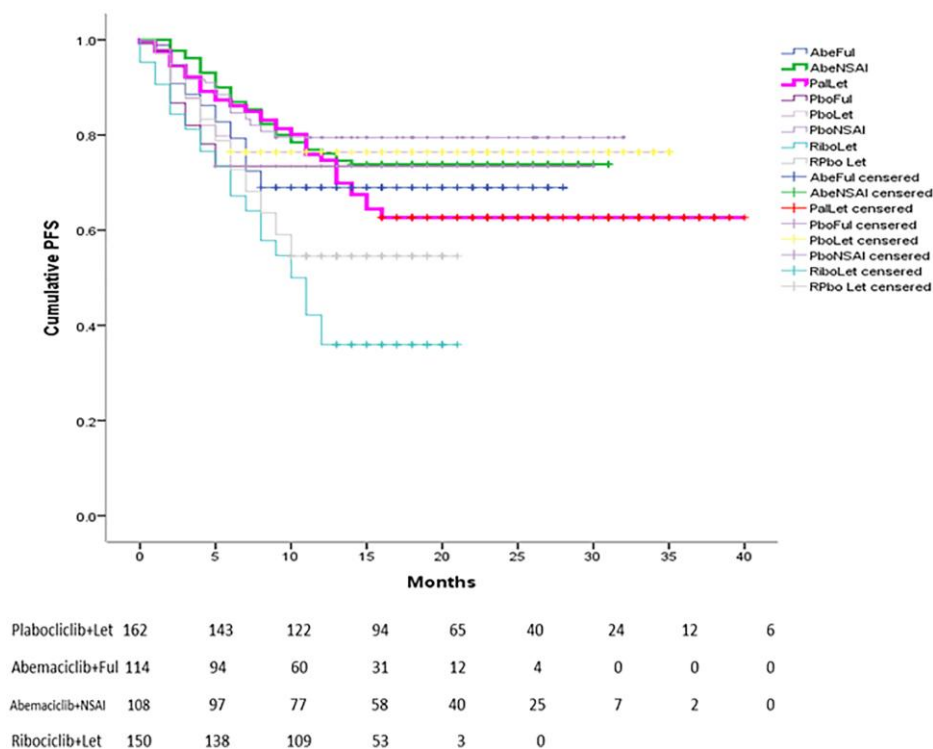

**Figure 1. Reconstructed Kaplan-Meier curves of PFS for individual patient data extracted from original studies related to CDK 4/6 for advanced BC.**



**Table 3. Treatment-related adverse events occurring in  $\geq 10\%$  of patients  $\geq 65$  years in either treatment group.**

| Authors study          | Intervention<br>Comparator | No of<br>patients | Any AE (N) % |                |             | AEs $\geq$ Grade 3 (N) % |          |         |           |                  |                  |          |           |               |  |
|------------------------|----------------------------|-------------------|--------------|----------------|-------------|--------------------------|----------|---------|-----------|------------------|------------------|----------|-----------|---------------|--|
| AE, n (%) <sup>a</sup> |                            | $\geq 65$         | All Grade    | Grade $\geq 3$ | Hematology  |                          |          |         |           | Non-Hematology   |                  |          |           |               |  |
|                        |                            |                   |              |                | Neutropenia | Leucopenia               | Anemia   | HTN     | Diarrhea  | ALT<br>increased | AST<br>increased | Fatigue  | Infection | VTE<br>events |  |
| Rugo 2018              | Pabociclib+EN              | 304               | 302 (33.4)   | 241 (79.3)     | 201 (66.1)  | 80 (26.1)                | 17 (5.6) |         | 5 (1.64)  |                  |                  | 13 (4.3) | 26 (8.6)  |               |  |
| Phase II RCT           | Placebo+EN                 | 161               | 150 (93.2)   | 33 (24.2)      | 1 (0.62)    | 0                        | 3 (1.86) | –       | 0 (0.0)   | –                | –                | 0        | 6 (3.7)   | –             |  |
| Snoke 2018             | Ribociclib+Let             | 150               | 148 (99)     | 130 (87)       | 90 (60)     | 31 (21)                  | 2 (1)    | 23 (15) | 3 (2)     | 14 (9)           | 6 (4)            | 3 (2)    |           |               |  |
| MONALEESA-2            | Placebo+Let                | 144               | 139 (97)     | 56 (39)        | 0           | 1 (1)                    | 2 (1)    | 25 (17) | 1 (1)     | 0                | 3 (2)            | 2 (1)    | –         | –             |  |
| Phase III RCT          |                            |                   |              |                |             |                          |          |         |           |                  |                  |          |           |               |  |
| Goetz 2021             | Abemaciclib+ET             | 302               | 100 (33.1)   | 163 (53.9)     | 75 (24.8)   |                          | –        |         | 44 (14.5) | 16 (5.3)         | 9 (3.0)          |          |           | 10 (3.3)      |  |
| MONARCH-2,3            | Placebo+ET                 | 162               | 19 (11.7)    | 47 (29.0)      | 2 (1.2)     |                          | –        |         | 2 (1.23)  | 2 (1.2)          | 4 (2.5)          | –        | –         | 1 (0.62)      |  |
| Phase III RCT          |                            |                   |              |                |             |                          |          |         |           |                  |                  |          |           |               |  |

<sup>a</sup>Pooled TEAEs from MONARCH 2 and MONARCH 3 occurring in  $\geq 10\%$  of patients in any age group. Abbreviations: NSAI: non-steroidal aromatase inhibitor; EN: endocrine therapy; ET: letrozole or anastrozole; — means not available.

observed only in patients aged  $\geq 75$  years who received Abemaciclib+ET.

### Study quality assessment

Good quality was observed in the included studies because no heterogeneity between studies ( $p = 0.06$ ,  $I^2 = 40\%$ ) was identified via pairwise meta-analysis (Supplementary Figure 2).

The results obtained using the RoB2 tool indicated that all identified RCTs had a low risk of bias in four

domains [28]. Although some concerns were raised about missing outcome data in all included studies [15–27] and deviations from the intended intervention domain in one phase II open-label study [24], all overall bias domains except PALOMA-1 were determined to be low-risk according to both raters (Figure 3).

No evidence of inconsistency between direct and indirect evidence impacted the outcomes of this network meta-analysis because the individual data points' posterior mean deviance contributions for the consistency model (horizontal axis) and the unrelated

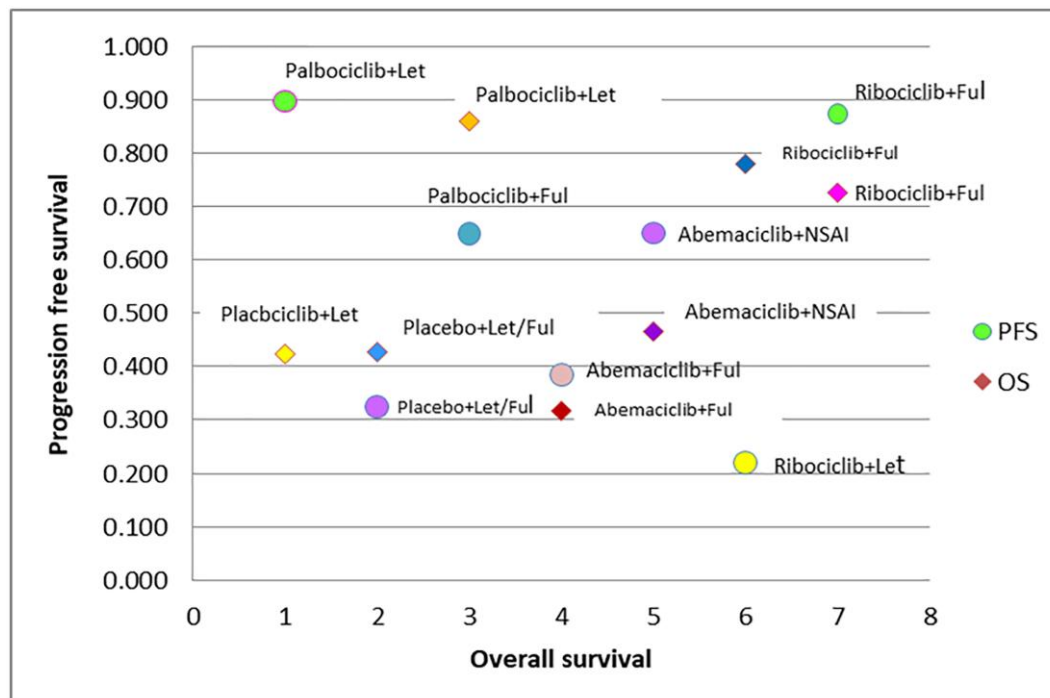

**Figure 2. SUCRA plot of CDK 4/6 efficacy ranking for progression free survival vs. overall survival.**

mean effects model (vertical axis) followed the line of equality. Therefore, assessment inconsistency did not affect the results of the network meta-analysis (Supplementary Figure 3).

Sensitivity analysis results for the network comparisons showed no significant difference between the random- and fixed-effects models for PFS (Tau = 0.1269; 95% CrI: 0.03872–0.3873 and OS (Tau = 0.138; 95% CrI: 0.04282–0.4189). The results of this study are robust.

DISCUSSION

To the best of our knowledge, this study describes the first NMA using data from phase II or III RCTs to compare the efficacy and safety of three CDK4/6 inhibitors in elderly patients with HR+/HER2–metastatic or advanced breast cancer. According to epidemiological studies, over two-thirds of patients diagnosed with HR+/HER2- breast cancer are aged 65 years or older [29–31]. Therefore, due to the high prevalence of pre-existing comorbidities and the perceived severity of the risks of using more aggressive conventional treatments in elderly individuals, the novel target therapy is considered appropriate for older patients.

Based on our findings, it can be concluded that the addition of CDK4/6 inhibitors to treatment for elderly

women with HR+/HER2 subtype metastatic or advanced BC can significantly and non-significantly improve PFS and OS with a similar incidence rate of severe AEs. The combinations of Palbociclib plus Letrozole and Ribociclib plus Letrozole were considered to have a greater effect on PFS and OS and a comparatively safe treatment option for this patient group. This result was supported by a systematic review and meta-analysis of retrospective real-world data on the use of CDK4/6 inhibitors in older and younger patients with breast cancer, indicating that Palbociclib and Ribociclib provided a better survival benefit to elderly patients [32].

Our findings reflect the difference of the patient selection in clinical trials and retrospective real-world. The general differences included the age limit to 65 years for older patients and relatively healthy. In contrast, retrospective studies have defined higher cutoff values for the elderly population aged ≥70 years. Although they had significantly more dose reductions and dose delays than younger patients, their PFS improvement is still significantly comparable with younger patients. Those studies reported the outcomes were not related to age [33]. In another real-world series, Wilkie et al. found no significant difference in dose reductions among women older and younger than 70 years [34]. The HR for PFS of the combination of CDK 4/6 inhibitors + aromatase inhibitors (AI) compared with AI alone was 0.52 (95% CI, 0.38 to 0.70)

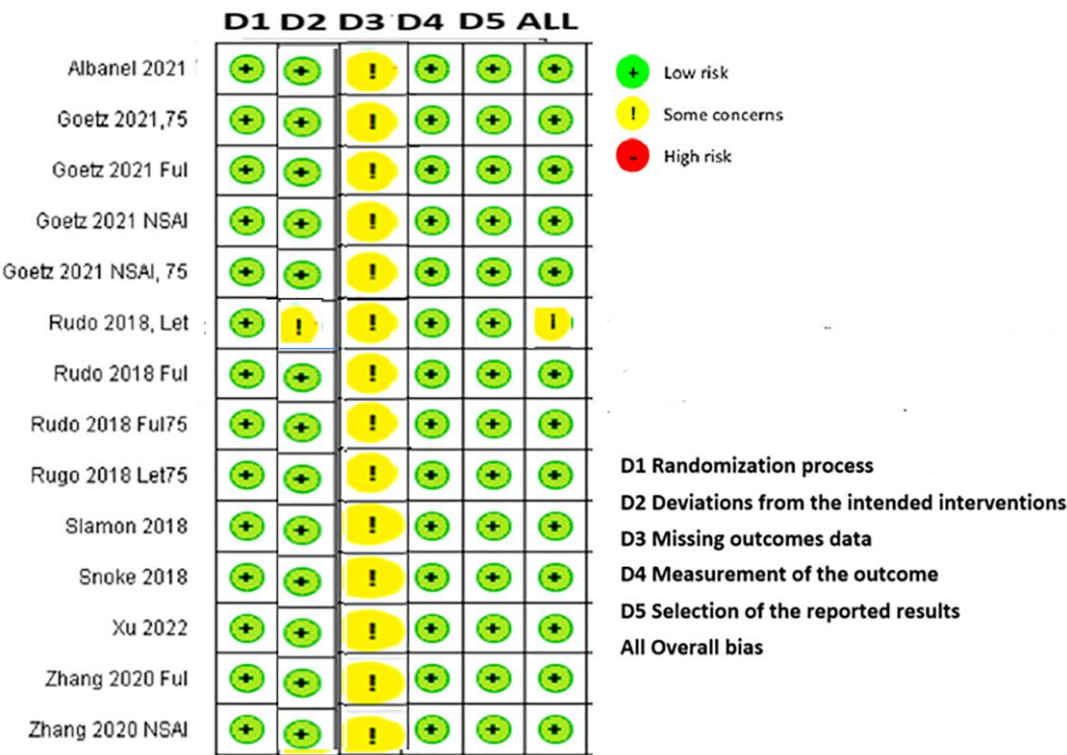

Figure 3. Cochrane risk-of-bias assessment tool for randomized trials version 2.

in an FDA pooled analysis [35], which was similar to the result attained in our analysis with patients older than 65 years (HR = 0.56 (95% CI: 0.50, 0.63)). In addition, our results are also supported by a recently published real world retrospective study, which indicated that patients aged 70 experienced prolonged PFS in response to CDK4/6 inhibitor-based therapy, particularly when combined with AI [36].

Recently, breast cancer in geriatric patients is considered a global challenge in the upcoming decades due to the ageing of the population worldwide. Many studies report that breast cancer has increased in elderly patients ( $\geq 70$  years) and suggest that the higher cancer mortality in this population could be related to organ dysfunction, an advanced and delayed diagnosis, and other morbidities. Furthermore, the elderly population with mBC remains excluded from clinical trials. Therefore, few data on the efficacy, safety, and short- and long-term outcomes of therapies based on the combined treatment of chemotherapy with CDK4/6 inhibitors are available. The results of this study can serve as updated evidence to confirm the efficacy and safety of CDK4/6 inhibitors in elderly patients with advanced or metastatic breast cancer.

Regarding safety, there were limited data reporting severe AEs in elderly patients in the included studies, but the incidence of severe AEs of grade 3 or above identified in the pooled analysis of included RCTs was relatively higher for Pabociclib+EN than for Ribociclib+Let and Abemaciclib+ET. In the subgroup analysis, neutropenia and diarrhea grades (G) 3–4 were similar in elderly patients. This result was consistent with a recently published systematic review and meta-analysis [32]. In addition, SAEs of VTE were reported only in patients aged  $\geq 65$  years treated with Abemaciclib+ET in our NMA. This result was consistent with previously published RCTs showing that VTE is an adverse event of particular concern with abemaciclib and is more common in patients aged  $\geq 75$  years old [37]. Another recently published review and meta-analysis reported that patients treated with Abemaciclib+ET had a higher VTE rate than those treated with Pabociclib+EN and Ribociclib+Let [38]. Therefore, these patients should be monitored more carefully for early symptoms during treatment tumor cells, immune cells, mesenchymal cells, cancer-linked fibroblasts, and extracellular matrix.

With the advancement of biotechnology and continuous research on the pathogenesis of breast cancer, the tumor microenvironment, comprising cellular components (such as cancer-associated fibroblasts, immune cells, endothelial cells, and adipocytes) and noncellular components (such as the extracellular matrix, cytokines,

chemokines, signal molecules) has been recognized as a critical contributor to the development and progression of BC [39, 40]. The present hypothesis is that interactions between TME components and cancer cells promote phenotypic heterogeneity, cellular plasticity, and cancer cell stemness, leading to tumor dormancy, enhanced invasion and metastasis, and the development of therapeutic resistance [41]. While previous research focused on targeting cancer cells with a poor prognosis, novel therapies targeting stromal components are currently under preclinical and clinical investigation. The efficacy of TME-guided therapy when used alone or in combination with chemotherapy or radiotherapy, tumor staging or the identification of molecular features and novel breast cancer stage-specific biomarkers, will help determine precise TME-guided therapy. In particular, adipocytes and fibroblasts become especially rich in elderly mammary glands [42].

In an era of population ageing, clinical decisions should be optimized based on several factors rather than the patients' age alone. These factors relate to the patients' comorbidities, performance status, life expectancy, and pathological tumor and molecular characteristics. Appropriate geriatric assessment is extremely important, yet healthcare providers do not embrace this process in an effort to avoid unnecessary under-treatment or subjecting patients to intolerable toxicity. The introduction of "geriatric oncology" as a specialty with proper focused training for oncologists across all field of oncology will hopefully improve the care of this very vulnerable group of patients.

The strength of this study is the low risk of bias in the randomization process in the NMA because all studies included provided the latest published data from phase II and III randomized clinical trials. Furthermore, individual patient data were used to enhance the accuracy of the results. However, this analysis had several limitations. First, adverse event data were not presented in all studies included; therefore, the toxicity of the treatment regimens may be underestimated. Second, geriatric comorbidities and geriatric assessments were not recorded or extensively assessed in any study, so publication bias may be present in this analysis.

Third, patients participating in RCTs are generally healthier than those in real-world retrospective studies, which may affect the accuracy of this NMA by excluding frail patients encountered in clinical practice. Despite these limitations, the sensitivity analysis was robust. This study provides clinicians with the first updated pooled estimates of CDK4/6 inhibitor efficacy and safety in elderly patients with advanced BC, providing further evidence for their clinical application.



## CONCLUSIONS

Overall, this is the first pooled analysis to demonstrate the OS and PFS benefits of CDK4/6 inhibitors in elderly patients (age  $\geq 65$  years) with advanced HR+/HER-2 metastatic or advanced breast cancer. We recommend that the National Health Administration in our country reinforce physicians', nurses', and caregivers' training on clinical breast self-examination and continue to promote mammography screening for elderly patients. Efforts should also be made to educate health professionals on the importance of conducting an appropriate assessment of the health status of older patients with cancer by using validated instruments and geriatric assessment tools. This assessment should be discussed with and offered to all patients after geriatric assessment and according to their toxicity profile. Finally, oncogeriatric assessment should be systematically considered if accessible.

## AUTHOR CONTRIBUTIONS

All authors contributed to the conception and design of the study. H.W.C.L., contributed to the conception and provided an expert opinion. M.C.T. contributed to data verification. S. H.L. contributed to data editing. A.L.F.C. contributed to data acquisition and analysis and drafting the manuscript. S.Y. W. contributed to the review and supervision. All authors have read and agreed to the published version of the manuscript.

## CONFLICTS OF INTEREST

The authors declare no conflicts of interest related to this study.

## FUNDING

This research was supported by An-Nan Hospital, China Medical University (Grant Number: ANHRF113-.25).

## REFERENCES

1. National development Council. Population Projections for the Republic of China (Taiwan). 2018. [https://www.hpa.gov.tw/File/Attach/8079/File\\_8123.pdf](https://www.hpa.gov.tw/File/Attach/8079/File_8123.pdf).
2. PDQ® Adult Treatment Editorial Board. PDQ Breast Cancer Treatment. Bethesda, MD: National Cancer Institute. 2024. <https://www.cancer.gov/types/breast/up/breast-treatment.pdf>.
3. Shachar SS, Hurria A, Muss HB. Breast Cancer in Women Older Than 80 Years. *J Oncol Pract*. 2016; 12:123–32.
4. Singh H, Kanapuru B, Smith C, Fashoyin-Aje LA, Myers A, Kim G, Pazdur R. FDA analysis of enrollment of older adults in clinical trials for cancer drug registration: a 10-year experience by the U.S. Food and Drug Administration. *J Clin Oncol*. 2017; 35:10009. <https://doi.org/10.1200/JOP.2015.010207> PMID:26869650
5. Petrelli F, Dottorini L, Di Menna G, Borronovo K, Parati MC, Rea CG, Ghilardi M, Ghidini A, Luciani A. The role of CDK4/6 inhibitors in older and younger patients with breast cancer: A systematic review and meta-analysis. *Breast*. 2023; 71:138–42. <https://doi.org/10.1016/j.breast.2023.05.002> PMID:37198053
6. Breast Cancer Facts and Statistics 2025. Breast Cancer org. facts-statistics. 2025. <https://www.breastcancer.org>.
7. Parums DV. Editorial: Review Articles, Systematic Reviews, Meta-Analysis, and the Updated Preferred Reporting Items for Systematic Reviews and Meta-Analyses (PRISMA) 2020 Guidelines. *Med Sci Monit*. 2021; 27:e934475. <https://doi.org/10.12659/MSM.934475> PMID:34421116
8. Leung JH, Wang SY, Leung HWC, Chan ALF. Comparative efficacy and safety of multimodality treatment for advanced hepatocellular carcinoma with portal vein tumor thrombus: patient-level network meta-analysis. *Front Oncol*. 2024; 14:1344798. <https://doi.org/10.3389/fonc.2024.1344798> PMID:38434681
9. Guyot P, Ades AE, Ouwers MJ, Welton NJ. Enhanced secondary analysis of survival data: reconstructing the data from published Kaplan-Meier survival curves. *BMC Med Res Methodol*. 2012; 12:9. <https://doi.org/10.1186/1471-2288-12-9> PMID:22297116
10. Sterne JAC, Savović J, Page MJ, Elbers RG, Blencowe NS, Boutron I, Cates CJ, Cheng HY, Corbett MS, Eldridge SM, Emberson JR, Hernán MA, Hopewell S, et al. RoB 2: a revised tool for assessing risk of bias in randomised trials. *BMJ*. 2019; 366:l4898. <https://doi.org/10.1136/bmj.l4898> PMID:31462531
11. Review Manager (RevMan) computer program, version 7.2.0. The Cochrane Collaboration. London, England: The Cochrane Collaboration. 2024. [https://training.cochrane.org/system/files/uploads/p/rotected\\_file/RevMan5.4\\_user\\_guide.pdf](https://training.cochrane.org/system/files/uploads/p/rotected_file/RevMan5.4_user_guide.pdf).

12. Brown S, Hutton B, Clifford T, Coyle D, Grima D, Wells G, Cameron C. A Microsoft-Excel-based tool for running and critically appraising network meta-analyses--an overview and application of NetMetaXL. *Syst Rev.* 2014; 3:110.  
<https://doi.org/10.1186/2046-4053-3-110>  
PMID:25267416
13. Ahn E, Kang H. Concepts and emerging issues of network meta-analysis. *Korean J Anesthesiol.* 2021; 74:371–82.  
<https://doi.org/10.4097/kja.21358>  
PMID:34551467
14. Sonke GS, Hart LL, Campone M, Erdkamp F, Janni W, Verma S, Villanueva C, Jakobsen E, Alba E, Wist E, Favret AM, Bachelot T, Hegg R, et al. Ribociclib with letrozole vs letrozole alone in elderly patients with hormone receptor-positive, HER2-negative breast cancer in the randomized MONALEESA-2 trial. *Breast Cancer Res Treat.* 2018; 167:659–69.  
<https://doi.org/10.1007/s10549-017-4523-y>  
PMID:29058175
15. Hortobagyi GN, Stemmer SM, Burris HA, Yap YS, Sonke GS, Hart L, Campone M, Petrakova K, Winer EP, Janni W, Conte P, Cameron DA, André F, et al. Overall Survival with Ribociclib plus Letrozole in Advanced Breast Cancer. *N Engl J Med.* 2022; 386:942–50.  
<https://doi.org/10.1056/NEJMoa2114663>  
PMID:35263519
16. Slamon DJ, Neven P, Chia S, Fasching PA, De Laurentiis M, Im SA, Petrakova K, Bianchi GV, Esteva FJ, Martín M, Nusch A, Sonke GS, De la Cruz-Merino L, et al. Phase III Randomized Study of Ribociclib and Fulvestrant in Hormone Receptor-Positive, Human Epidermal Growth Factor Receptor 2-Negative Advanced Breast Cancer: MONALEESA-3. *J Clin Oncol.* 2018; 36:2465–72.  
<https://doi.org/10.1200/JCO.2018.78.9909>  
PMID:29860922
17. Slamon DJ, Neven P, Chia S, Jerusalem G, De Laurentiis M, Im S, Petrakova K, Valeria Bianchi G, Martín M, Nusch A, Sonke GS, De la Cruz-Merino L, Beck JT, et al. Ribociclib plus fulvestrant for postmenopausal women with hormone receptor-positive, human epidermal growth factor receptor 2-negative advanced breast cancer in the phase III randomized MONALEESA-3 trial: updated overall survival. *Ann Oncol.* 2021; 32:1015–24.  
<https://doi.org/10.1016/j.annonc.2021.05.353>  
PMID:34102253
18. Sledge GW Jr, Toi M, Neven P, Sohn J, Inoue K, Pivot X, Burdaeva O, Okera M, Masuda N, Kaufman PA, Koh H, Grischke EM, Conte P, et al. The Effect of Abemaciclib Plus Fulvestrant on Overall Survival in Hormone Receptor-Positive, ERBB2-Negative Breast Cancer That Progressed on Endocrine Therapy-MONARCH 2: A Randomized Clinical Trial. *JAMA Oncol.* 2020; 6:116–24.  
<https://doi.org/10.1001/jamaoncol.2019.4782>  
PMID:31563959
19. Goetz MP, Okera M, Wildiers H, Campone M, Grischke EM, Manso L, André VAM, Chouaki N, San Antonio B, Toi M, Sledge GW Jr. Safety and efficacy of abemaciclib plus endocrine therapy in older patients with hormone receptor-positive/human epidermal growth factor receptor 2-negative advanced breast cancer: an age-specific subgroup analysis of MONARCH 2 and 3 trials. *Breast Cancer Res Treat.* 2021; 186:417–28.  
<https://doi.org/10.1007/s10549-020-06029-y>  
PMID:33392835
20. Goetz MP, Toi M, Huober J, Sohn J, Trédan O, Park IH, Campone M, Chen SC, Manso LM, Paluch-Shimon S, Freedman OC, O'Shaughnessy J, Pivot X, et al. Abemaciclib plus a nonsteroidal aromatase inhibitor as initial therapy for HR+, HER2- advanced breast cancer: final overall survival results of MONARCH 3. *Ann Oncol.* 2024; 35:718–27.  
<https://doi.org/10.1016/j.annonc.2024.04.013>  
PMID:38729566
21. Zhang QY, Sun T, Yin YM, Li HP, Yan M, Tong ZS, Oppermann CP, Liu YP, Costa R, Li M, Cheng Y, Ouyang QC, Chen X, et al. MONARCH plus: abemaciclib plus endocrine therapy in women with HR+/HER2- advanced breast cancer: the multinational randomized phase III study. *Ther Adv Med Oncol.* 2020; 12:1758835920963925.  
<https://doi.org/10.1177/1758835920963925>  
PMID:33149768
22. Slamon DJ, Diéras V, Rugo HS, Harbeck N, Im SA, Gelmon KA, Lipatov ON, Walshe JM, Martin M, Chavez-MacGregor M, Bananis E, Gauthier E, Lu DR, et al. Overall Survival With Palbociclib Plus Letrozole in Advanced Breast Cancer. *J Clin Oncol.* 2024; 42:994–1000.  
<https://doi.org/10.1200/JCO.23.00137>  
PMID:38252901
23. Rugo HS, Turner NC, Finn RS, Joy AA, Verma S, Harbeck N, Masuda N, Im SA, Huang X, Kim S, Sun W, Iyer S, Schnell P, et al. Palbociclib plus endocrine therapy in older women with HR+/HER2- advanced breast cancer: a pooled analysis of randomised PALOMA clinical studies. *Eur J Cancer.* 2018; 101:123–33.  
<https://doi.org/10.1016/j.ejca.2018.05.017>  
PMID:30053671
24. Xu B, Hu X, Li W, Sun T, Shen K, Wang S, Cheng Y, Zhang Q, Cui S, Tong Z, Geng C, Song E, Huang CS, et al.

- Palbociclib plus letrozole versus placebo plus letrozole in Asian postmenopausal women with oestrogen receptor-positive/human epidermal growth factor receptor 2-negative advanced breast cancer: Primary results from PALOMA-4. *Eur J Cancer*. 2022; 175:236–45.  
<https://doi.org/10.1016/j.ejca.2022.08.012>  
PMID:[36155117](https://pubmed.ncbi.nlm.nih.gov/36155117/)
25. Turner NC, Slamon DJ, Ro J, Bondarenko I, Im SA, Masuda N, Colleoni M, DeMichele A, Loi S, Verma S, Iwata H, Harbeck N, Loibl S, et al. Overall Survival with Palbociclib and Fulvestrant in Advanced Breast Cancer. *N Engl J Med*. 2018; 379:1926–36.  
<https://doi.org/10.1056/NEJMoa1810527>  
PMID:[30345905](https://pubmed.ncbi.nlm.nih.gov/30345905/)
  26. Albanell J, Martínez MT, Ramos M, O'Connor M, de la Cruz-Merino L, Santaballa A, Martínez-Jañez N, Moreno F, Fernández I, Alarcón J, Virizuela JA, de la Haba-Rodríguez J, Sánchez-Rovira P, et al. Randomized phase II study of fulvestrant plus palbociclib or placebo in endocrine-sensitive, hormone receptor-positive/HER2-advanced breast cancer: GEICAM/2014-12 (FLIPPER). *Eur J Cancer*. 2022; 161:26–37.  
<https://doi.org/10.1016/j.ejca.2021.11.010>  
PMID:[34902765](https://pubmed.ncbi.nlm.nih.gov/34902765/)
  27. Finn RS, Boer K, Bondarenko I, Patel R, Pinter T, Schmidt M, Shparyk YV, Thummala A, Voitko N, Bananis E, McRoy L, Wilner K, Huang X, et al. Overall survival results from the randomized phase 2 study of palbociclib in combination with letrozole versus letrozole alone for first-line treatment of ER+/HER2-advanced breast cancer (PALOMA-1, TRIO-18). *Breast Cancer Res Treat*. 2020; 183:419–28.  
<https://doi.org/10.1007/s10549-020-05755-7>  
PMID:[32683565](https://pubmed.ncbi.nlm.nih.gov/32683565/)
  28. Abdel-Razeq H, Abu Rous F, Abuhijla F, Abdel-Razeq N, Edaily S. Breast Cancer in Geriatric Patients: Current Landscape and Future Prospects. *Clin Interv Aging*. 2022; 17:1445–60.  
<https://doi.org/10.2147/CIA.S365497>  
PMID:[36199974](https://pubmed.ncbi.nlm.nih.gov/36199974/)
  29. Lemij AA, Bastiaannet E, de Glas NA, van den Bos F, Portielje JEA, Liefers GJ, Derks MGM. Breast cancer in the older population: a global challenge—an epidemiological perspective. *Ann Breast Surg*. 2023; 7:17.  
<https://doi.org/10.21037/abs-21-89>
  30. Pla H, Felip E, Obadia V, Pernas S, Viñas G, Margelí M, Fort-Culillas R, Del Barco S, Sabaté N, Fort E, Lezcano C, Cirauqui B, Quiroga V, et al. Elderly patients with hormone receptor-positive HER2-negative metastatic breast cancer treated with CDK4/6 inhibitors in a multicentre cohort. *Clin Transl Oncol*. 2024; 26:1748–58.  
<https://doi.org/10.1007/s12094-024-03399-3>  
PMID:[38519708](https://pubmed.ncbi.nlm.nih.gov/38519708/)
  31. Kahraman S, Hizal M, Demirel BC, Guven DC, Gumusay O, Uluc BO, Bayram E, Gulbagci B, Yasar A, Davarci SE, Mocan EE, Acar O, Isik D, et al. Activity of CDK4/6 inhibitors and parameters affecting survival in elderly patients in age-subgroups: Turkish Oncology Group (TOG) retrospective study. *BMC Cancer*. 2024; 24:1592.  
<https://doi.org/10.1186/s12885-024-13357-5>  
PMID:[39736618](https://pubmed.ncbi.nlm.nih.gov/39736618/)
  32. Clifton K, Min Y, Kimmel J, Litton J, Tripathy D, Karuturi M. Progression-free survival (PFS) and toxicities of palbociclib in a geriatric population. *Breast Cancer Res Treat*. 2019; 175:667–74.  
<https://doi.org/10.1007/s10549-019-05181-4>  
PMID:[30835017](https://pubmed.ncbi.nlm.nih.gov/30835017/)
  33. Wilkie J, Schickli MA, Berger MJ, Lustberg M, Reinbolt R, Noonan A, Ramaswamy B, Sardesai S, VanDeusen J, Wesolowski R, Williams N, Stover DG, Li J, Vargo CA. Progression-Free Survival for Real-World Use of Palbociclib in Hormone Receptor-Positive Metastatic Breast Cancer. *Clin Breast Cancer*. 2020; 20:33–40.  
<https://doi.org/10.1016/j.clbc.2019.06.010>  
PMID:[31451366](https://pubmed.ncbi.nlm.nih.gov/31451366/)
  34. Howie LJ, Singh H, Bloomquist E, Wedam S, Amiri-Kordestani L, Tang S, Sridhara R, Sanchez J, Prowell TM, Kluetz PG, King-Kallimanis BL, Gao JJ, Ibrahim A, et al. Outcomes of Older Women With Hormone Receptor-Positive, Human Epidermal Growth Factor Receptor-Negative Metastatic Breast Cancer Treated With a CDK4/6 Inhibitor and an Aromatase Inhibitor: An FDA Pooled Analysis. *J Clin Oncol*. 2019; 37:3475–83.  
<https://doi.org/10.1200/JCO.18.02217>  
PMID:[31560580](https://pubmed.ncbi.nlm.nih.gov/31560580/)
  35. O'Connor TN, Schultz E, Wang J, O'Connor T, Levine E, Knudsen ES, Witkiewicz AK. Real-World Experience among Elderly Metastatic Breast Cancer Patients Treated with CDK4/6 Inhibitor-Based Therapy. *Cancers (Basel)*. 2024; 16:1749.  
<https://doi.org/10.3390/cancers16091749>  
PMID:[38730702](https://pubmed.ncbi.nlm.nih.gov/38730702/)
  36. Mehraj U, Ganai RA, Macha MA, Hamid A, Zargar MA, Bhat AA, Nasser MW, Haris M, Batra SK, Alshehri B, Al-Baradie RS, Mir MA, Wani NA. The tumor microenvironment as driver of stemness and therapeutic resistance in breast cancer: New challenges and therapeutic opportunities. *Cell Oncol (Dordr)*. 2021; 44:1209–29.  
<https://doi.org/10.1007/s13402-021-00634-9>  
PMID:[34528143](https://pubmed.ncbi.nlm.nih.gov/34528143/)

37. Thein KZ, Htut TW, Ball S, Swarup S, Sultan A, Oo TH. Venous thromboembolism risk in patients with hormone receptor-positive HER2-negative metastatic breast cancer treated with combined CDK 4/6 inhibitors plus endocrine therapy versus endocrine therapy alone: a systematic review and meta-analysis of randomized controlled trials. *Breast Cancer Res Treat.* 2020; 183:479–87.  
<https://doi.org/10.1007/s10549-020-05783-3>  
PMID:[32647939](https://pubmed.ncbi.nlm.nih.gov/32647939/)
38. Bolzacchini E, Pomero F, Fazio M, Civitelli C, Fabro G, Pellegrino D, Giordano M, Squizzato A. Risk of venous and arterial thromboembolic events in women with advanced breast cancer treated with CDK 4/6 inhibitors: A systematic review and meta-analysis. *Thromb Res.* 2021; 208:190–7.  
<https://doi.org/10.1016/j.thromres.2021.11.009>  
PMID:[34814055](https://pubmed.ncbi.nlm.nih.gov/34814055/)
39. Wei R, Liu S, Zhang S, Min L, Zhu S. Cellular and Extracellular Components in Tumor Microenvironment and Their Application in Early Diagnosis of Cancers. *Anal Cell Pathol (Amst).* 2020; 2020:6283796.  
<https://doi.org/10.1155/2020/6283796>  
PMID:[32377504](https://pubmed.ncbi.nlm.nih.gov/32377504/)
40. Tumor Microenvironment: The Functions and Underlying Mechanisms of Cellular and Non-cellular Components During Cancer Progression and Metastasis. 2024.  
<https://www.frontiersin.org/research-topics/52194/tumor-microenvironment>.
41. Bejarano L, Jordão MJC, Joyce JA. Therapeutic Targeting of the Tumor Microenvironment. *Cancer Discov.* 2021; 11:933–59.  
<https://doi.org/10.1158/2159-8290.CD-20-1808>  
PMID:[33811125](https://pubmed.ncbi.nlm.nih.gov/33811125/)
42. Lin J, Ye S, Ke H, Lin L, Wu X, Guo M, Jiao B, Chen C, Zhao L. Changes in the mammary gland during aging and its links with breast diseases. *Acta Biochim Biophys Sin (Shanghai).* 2023; 55:1001–19.  
<https://doi.org/10.3724/abbs.2023073>  
PMID:[37184281](https://pubmed.ncbi.nlm.nih.gov/37184281/)

SUPPLEMENTARY MATERIALS

Supplementary Figures

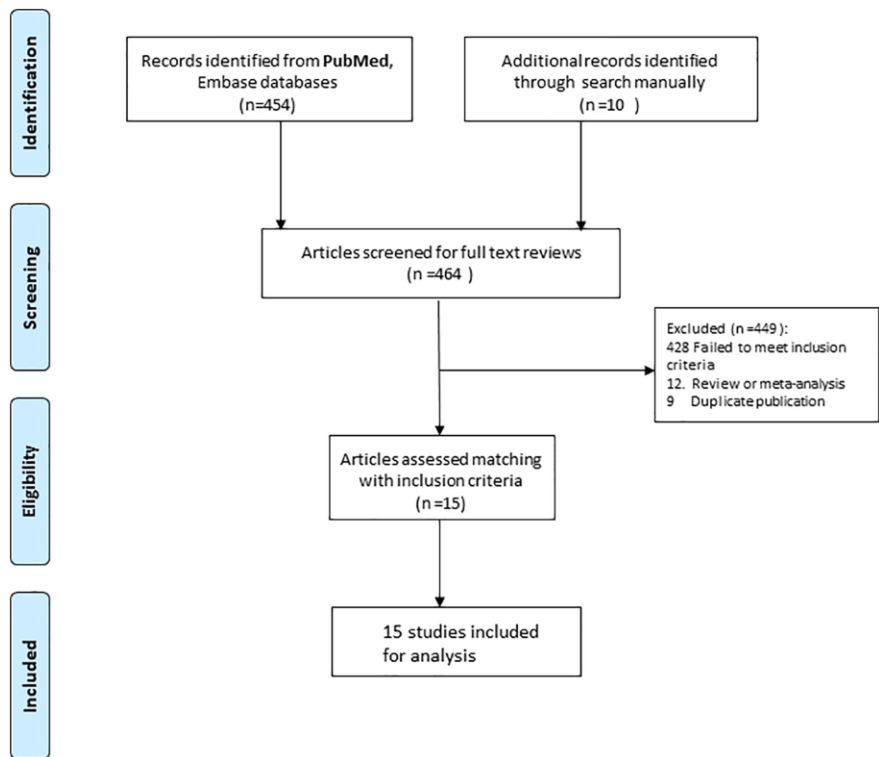

Supplementary Figure 1. The flow chart summarizing the process for the identification of the eligible clinical studies.

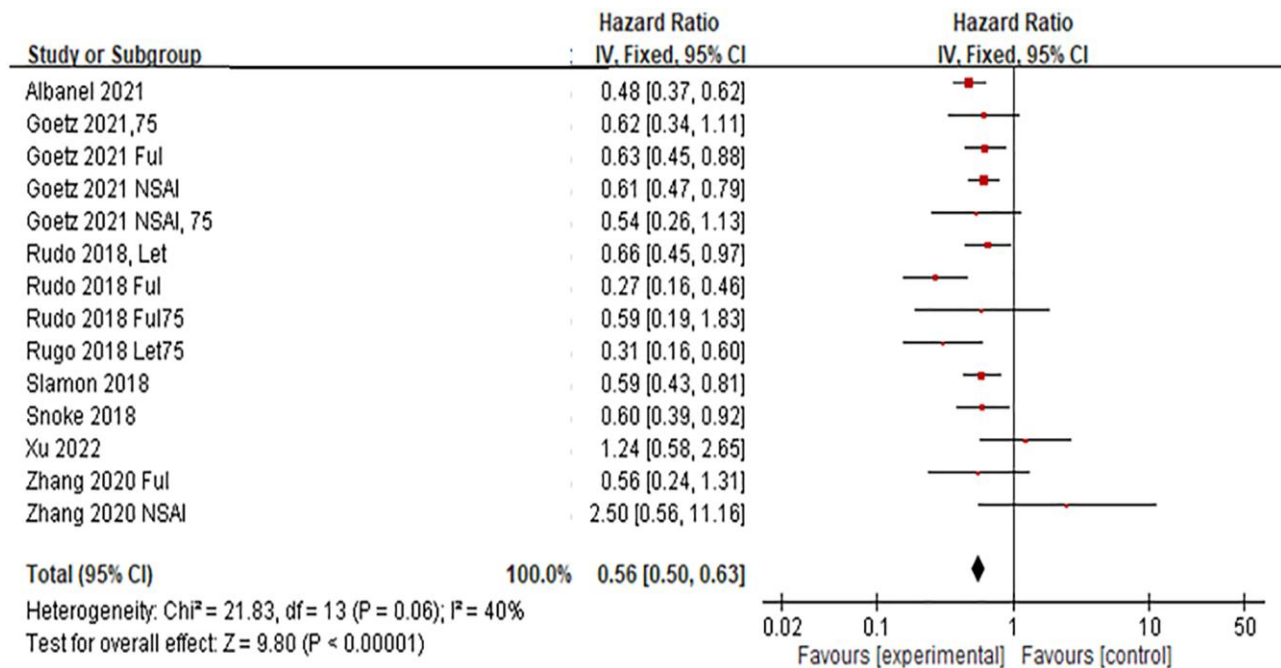

Supplementary Figure 2. PFS in pairwise analysis.



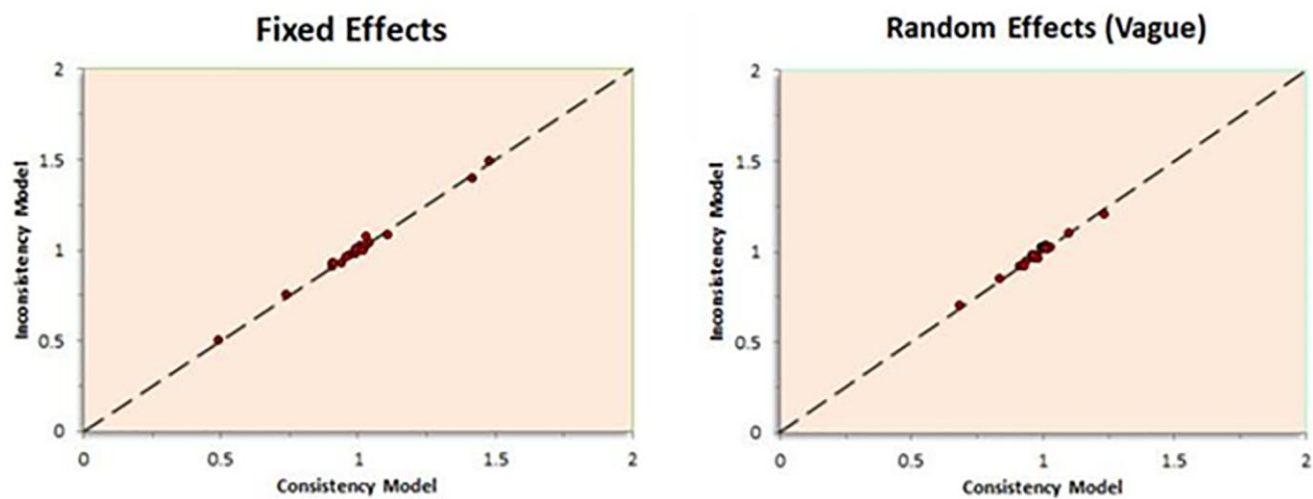

**Supplementary Figure 3. Inconsistency vs. consistency plot for Progression free survival of COK 4–6 treatments.** Plot of individual data points for the consistency model (horizontal axis) and the inconsistency model (vertical axis), along with the equality line.

## Supplementary Table

### Database: PubMed (June 23, 2024)

| Search strategy                                         | Number of records |
|---------------------------------------------------------|-------------------|
| 1. Palbociclib plus endocrine therapy                   | 190               |
| 2. old age or elderly AND advanced breast cancer 3. 1+2 | 287               |
|                                                         | 35                |
| 4. ribociclib plus endocrine therapy                    | 85                |
| 5. 4+2                                                  | 17                |
| 6. Abemaciclib plus endocrine therapy                   | 90                |
| 7. 6+2                                                  | 13                |
| 8. Phase III randomized clinical trial                  | 31,572            |
| 9. 6+2+8                                                | 6                 |
| 10. 4+2+8                                               | 11                |
| 11. 1+2+8                                               | 11                |

### Database: Embase (June 23, 2024)

| Search strategy                                                                                                                                            | Number of records |
|------------------------------------------------------------------------------------------------------------------------------------------------------------|-------------------|
| 1. ('palbociclib plus endocrine therapy':ab,ti AND 'old age':ab,ti OR elderly:ab,ti) AND 'advanced breast cancer':ab,ti AND 'phase 3 clinical trial':ab,ti | 6                 |
| 2. ('ribociclib plus endocrine therapy':ab,ti AND 'old age':ab,ti OR elderly:ab,ti) AND 'advanced breast cancer':ab,ti AND 'phase iii':ab,ti               | 15                |
| 3. ('abemaciclib plus endocrine therapy':ab,ti AND 'old age':ab,ti OR elderly:ab,ti) AND 'advanced breast cancer':ab,ti AND 'phase 3':ab,ti                | 6                 |
| 4. #1 or #2 or #3                                                                                                                                          | 6                 |

### Database: Cochrane Library (Mar 15, 2025)

| Search strategy                                                                  | Number of records |
|----------------------------------------------------------------------------------|-------------------|
| # 1. Palbociclib plus endocrine therapy):ti,ab,kw                                | 230               |
| # 2. elderly or old women or female patients):ti,ab,kw                           | 32806             |
| # 3. metastatic or advanced breast cancer                                        | 20287             |
| # 4. #1 AND # 2 AND # 3                                                          | 191               |
| # 5. (Ribociclib plus Fulvestrant):ti,ab,kw (Word variations have been searched) | 49                |
| # 6. #5 AND # 2 AND # 3                                                          | 42                |
| # 7. Abemaciclib plus letrozole or anastrozole                                   | 466               |
| # 8. #7 AND #2 AND #3                                                            | 163               |
| #9. Lerociclib plus fulvestrant                                                  | 3                 |
| #10. #9 AND #2 AND #3                                                            | 3                 |

### Database: Web of Science (March 15, 2025)

|                                                                                                                                                                                                                                                                            |   |
|----------------------------------------------------------------------------------------------------------------------------------------------------------------------------------------------------------------------------------------------------------------------------|---|
| #1. TITLE ("CDK4/6") AND ("elderly patient or women") AND ("Phase III randomized clinical trial") AND ("metastatic or advanced breast cancer")                                                                                                                             | 0 |
| #2. TITLE ("Palbociclib plus letrozole or fulvestrant ") AND ("Ribociclib plus fulvestrant ") AND ("Abemaciclib plus letrozole or fulvestrant ") AND ("elderly patient or women") AND ("Phase III randomized clinical trial") AND ("metastatic or advanced breast cancer") | 0 |
