# Supplementary material for: Updated efficacy and safety of CDK4/6 inhibitors plus endocrine therapy in elderly women with HR+/HER-2 metastatic or advanced breast cancer: patient-level network meta-analysis
Source: publisher site journal article supplement (doi:10.18632/aging.206257), 2025-05-25
Supplement: Supplementary file [file aging-v17i5-206257-supplementary-material-SD1.pdf]

SUPPLEMENTARY FIGURES

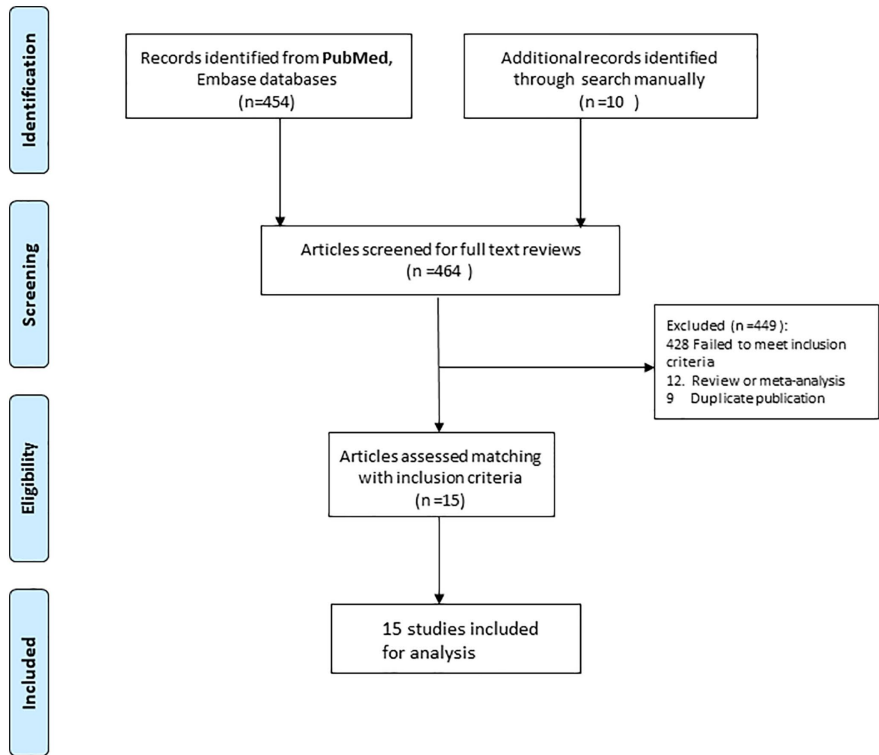

Supplementary Figure 1. The flow chart summarizing the process for the identification of the eligible clinical studies.

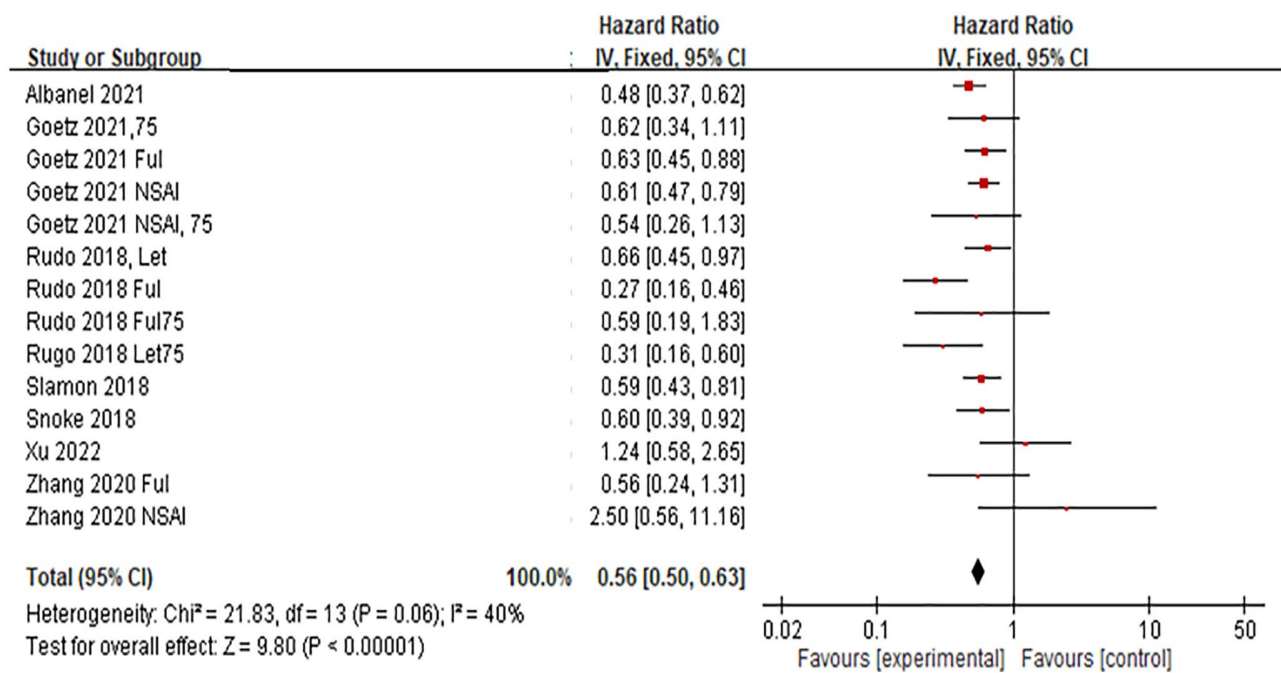

Supplementary Figure 2. PFS in pairwise analysis.

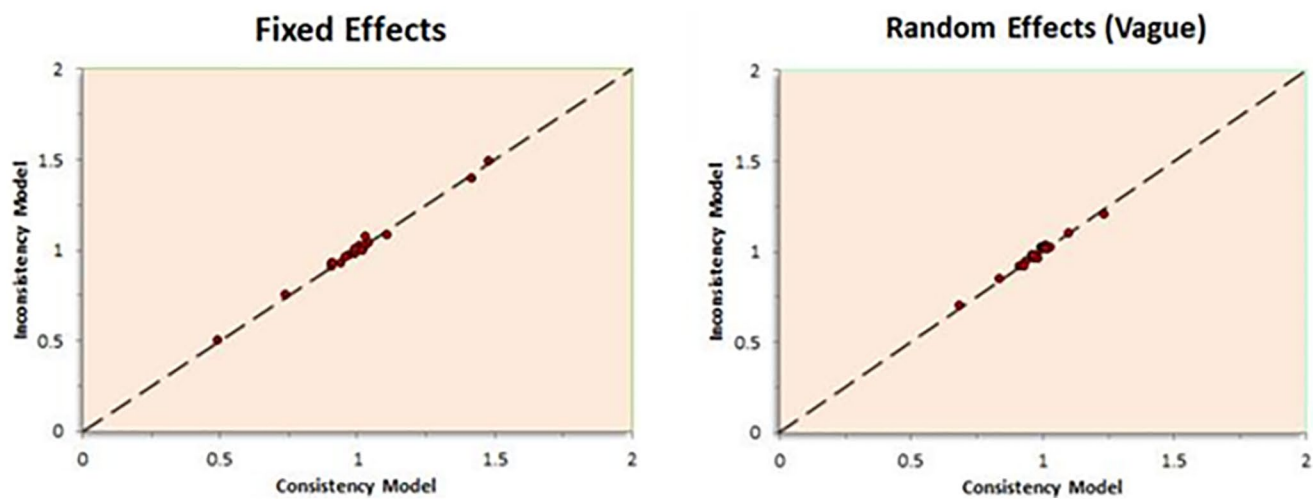

**Supplementary Figure 3. Inconsistency vs. consistency plot for Progression free survival of COK 4–6 treatments.** Plot of individual data points for the consistency model (horizontal axis) and the inconsistency model (vertical axis), along with the equality line.
